# Supplementary material for: Asthmatic Patients with Vitamin D Deficiency have Decreased Exacerbations after Vitamin Replacement
Source: Nutrients. 2017 Nov 11;9(11):1234. doi: 10.3390/nu9111234 (PMC5707706; doi:10.3390/nu9111234)
Supplement: Supplementary file 1 [file nutrients-09-01234-s001.docx]

Table S1. Prevalence of comorbidities in the 119 asthma patients

| Comorbidity | N (%) |
| --- | --- |
| Rhinitis | 89 (74.8) |
| Rhinosinusitis | 57 (47.9) |
| Systemic arterial hypertension | 61 (51.6) |
| Heart disease | 45 (37,8) |
| GERD | 39 (32.8) |
| Thyroid disease | 29 (24.4) |
| Anxiety/depression | 28 (23.5) |
| COPD | 21 (17.6) |
| Osteoporosis | 37 (31.1) |
| OSA | 8 (06.7) |

TABLE S2

Results of theGeneral linear model analysis on the relationship of exacerbations with patients’ characteristics, lung function tests and FENO. Age, sex, BMI, cigarette smoking, spirometric variables and FENO had no significant influence on exacerbation rate.

Dependent variable: number of exacerbations per year

| Source | Type III Sum of Squares | df | Mean Square | F | Sig. | Partial Zeta Squared |
| --- | --- | --- | --- | --- | --- | --- |
| Corrected Model | 17.819a | 9 | 1.980 | 1.104 | .370 | .117 |
| Intercept | .002 | 1 | .002 | .001 | .974 | .000 |
| Gender | .054 | 1 | .054 | .030 | .863 | .000 |
| Age | 1.068 | 1 | 1.068 | .595 | .443 | .008 |
| Smoking Status | .342 | 2 | .171 | .095 | .909 | .003 |
| BMI | .569 | 1 | .569 | .317 | .575 | .004 |
| FEV1 (%) | 1.996 | 1 | 1.996 | 1.113 | .295 | .015 |
| VC (%) | 1.023 | 1 | 1.023 | .570 | .453 | .008 |
| FEV1/VC | .527 | 1 | .527 | .294 | .589 | .004 |
| FENO (ppb) | .497 | 1 | .497 | .277 | .600 | .004 |
| Error | 134.487 | 75 | 1.793 |  |  |  |
| Total | 542.000 | 85 |  |  |  |  |
| Corrected Total | 152.306 | 84 |  |  |  |  |
| a. R Squared = .117 (Adjusted R Squared = .011) | | | | | | |

TABLE S3

Relationship of asthma exacerbations with patients’ characteristics, and asthma therapy

Anti-asthma treatment with inhaled corticosteroids (ICS), long acting beta-agonist (LABA) and anti-muscarinic (LAMA),and oral leukotrienes-receptor antagonist (LTRA) had no significant influence on exacerbations. The only factor significantly related to the number of exacerbations was the need of oral corticosteroid course.

| Dependent variable: number of exacerbations per year | | | | | | |
| --- | --- | --- | --- | --- | --- | --- |
| Source | Type III Sum of Squares | df | Mean Square | F | Sig. | Partial Eta Squared |
| Corrected Model | 42.595a | 11 | 3.872 | 2.663 | .005 | .230 |
| Intercept | .561 | 1 | .561 | .386 | .536 | .004 |
| LABA | .205 | 1 | .205 | .141 | .708 | .001 |
| ICS-LABA | .389 | 1 | .389 | .268 | .606 | .003 |
| LAMA | .628 | 1 | .628 | .432 | .513 | .004 |
| LTRA | 2.231 | 1 | 2.231 | 1.534 | .218 | .015 |
| ICS score | .682 | 1 | .682 | .469 | .495 | .005 |
| Oral CS | 16.479 | 1 | 16.479 | 11.333 | .001 | .104 |
| Gender | .265 | 1 | .265 | .182 | .670 | .002 |
| Age | 1.989 | 1 | 1.989 | 1.368 | .245 | .014 |
| BMI | 2.358 | 1 | 2.358 | 1.622 | .206 | .016 |
| Smoking Status | 1.358 | 2 | .679 | .467 | .628 | .009 |
| Error | 142.496 | 98 | 1.454 |  |  |  |
| Total | 666.000 | 110 |  |  |  |  |
| Corrected Total | 185.091 | 109 |  |  |  |  |
| a. R Squared = .230 (Adjusted R Squared = .144) | | | | | | |

TABLE S4

Relationship of asthma exacerbations with nutritional status

The only nutritional factor significantly related to the number of exacerbations was vitamin D (25-OHD). Other nutrients had no significant influence on exacerbations The only nutritional factor significantly related to the number of exacerbations was vitamin D (25-OHD). Other nutrients had no significant influence on exacerbations.

| Dependent Variable: number of exacerbations | | | | | | |
| --- | --- | --- | --- | --- | --- | --- |
| Source | Type III Sum of Squares | df | Mean Square | F | Sig. | Partial Eta Squared |
| Corrected Model | 24.286a | 13 | 1.868 | 1.506 | .167 | .372 |
| Intercept | 2.221 | 1 | 2.221 | 1.790 | .190 | .051 |
| 25-OHD | 11.241 | 1 | 11.241 | 9.059 | .005 | .215 |
| Calcium | .412 | 1 | .412 | .332 | .568 | .010 |
| Phosphorus | 1.266 | 1 | 1.266 | 1.020 | .320 | .030 |
| PTH | .069 | 1 | .069 | .056 | .815 | .002 |
| Ferritin | .811 | 1 | .811 | .653 | .425 | .019 |
| Vitamin B12 | .172 | 1 | .172 | .139 | .712 | .004 |
| Magnesium | 1.003 | 1 | 1.003 | .808 | .375 | .024 |
| Folic acid | 1.023 | 1 | 1.023 | .824 | .371 | .024 |
| Gender | .063 | 1 | .063 | .051 | .823 | .002 |
| Age | .000 | 1 | .000 | .000 | .985 | .000 |
| BMI | .087 | 1 | .087 | .070 | .793 | .002 |
| Smoking Status | 1.232 | 2 | .616 | .497 | .613 | .029 |
| Error | 40.948 | 33 | 1.241 |  |  |  |
| Total | 278.000 | 47 |  |  |  |  |
| Corrected Total | 65.234 | 46 |  |  |  |  |
| a. R Squared = .372 (Adjusted R Squared = .125) | | | | | | |

PTH serum parathyroid hormone

TABLE S5

Relationship of vitamin D with exacerbations, lung function tests and ICS dose

Vitamin D was significantly negatively related with the number of exacerbations, but was independent of lung function tests and dose of inhaled corticosteroids (ICS).

| Dependent Variable: Baseline Vitamin D | | | | | | |
| --- | --- | --- | --- | --- | --- | --- |
| Source | Type III Sum of Squares | df | Mean Square | F | Sig. | Partial Eta Squared |
| Corrected Model | 1413.708a | 5 | 282.742 | 5.944 | .000 | .231 |
| Intercept | 492.596 | 1 | 492.596 | 10.356 | .002 | .095 |
| Exacerbations | 863.048 | 1 | 863.048 | 18.144 | .000 | .155 |
| FEV1 (%) | 12.938 | 1 | 12.938 | .272 | .603 | .003 |
| FEV1/FVC | 3.762 | 1 | 3.762 | .079 | .779 | .001 |
| ICS Score | .805 | 1 | .805 | .017 | .897 | .000 |
| Error | 4709.082 | 99 | 47.566 |  |  |  |
| Total | 35489.800 | 105 |  |  |  |  |
| Corrected Total | 6122.790 | 104 |  |  |  |  |
| a. R Squared = .231 (Adjusted R Squared = .192) | | | | | | |

TABLE S6

Relationship of vitamin D with comorbidities

The only comorbidities related with vitamin D were rhinosinusitis and osteoporosis. Other comorbidities, in particular concomitant COPD, had no significant influence on the levels of 25-OHD.

| Dependent Variable: Baseline Vitamin D | | | | | | |
| --- | --- | --- | --- | --- | --- | --- |
| Source | Type III Sum of Squares | df | Mean Square | F | Sig. | Partial Eta Squared |
| Corrected Model | 1083.648a | 14 | 77.403 | 1.382 | .178 | .177 |
| Intercept | 735.467 | 1 | 735.467 | 13.136 | .000 | .127 |
| BMI | 37.588 | 1 | 37.588 | .671 | .415 | .007 |
| Smoking Status | 20.143 | 2 | 10.072 | .180 | .836 | .004 |
| Atopy | 16.022 | 1 | 16.022 | .286 | .594 | .003 |
| Rhinitis | 79.501 | 1 | 79.501 | 1.420 | .237 | .016 |
| Rhinosinusitis | 342.513 | 1 | 342.513 | 6.117 | .015 | .064 |
| Osteoporosis | 383.162 | 1 | 383.162 | 6.843 | .010 | .071 |
| Hypertension | 16.274 | 1 | 16.274 | .291 | .591 | .003 |
| Heart disease | 11.244 | 1 | 11.244 | .201 | .655 | .002 |
| Depression | .880 | 1 | .880 | .016 | .900 | .000 |
| Thyroid disease | 21.333 | 1 | 21.333 | .381 | .539 | .004 |
| OSAS | 18.831 | 1 | 18.831 | .336 | .563 | .004 |
| COPD | 45.036 | 1 | 45.036 | .804 | .372 | .009 |
| GERD | 25.552 | 1 | 25.552 | .456 | .501 | .005 |
| Error | 5039.143 | 90 | 55.990 |  |  |  |
| Total | 35489.800 | 105 |  |  |  |  |
| Corrected Total | 6122.790 | 104 |  |  |  |  |
| a. R Squared = .177 (Adjusted R Squared = .049) | | | | | | |
